# Supplementary material for: HHLA2 deficiency inhibits non‐small cell lung cancer progression and THP‐1 macrophage M2 polarization
Source: PubMed Central journal article supplement (PMC8335813; doi:10.1002/cam4.4081), 2021-06-21
Supplement: CAM4-10-5256-s001.pdf [file CAM4-10-5256-s001.pdf]

## Supplementary figure and legends

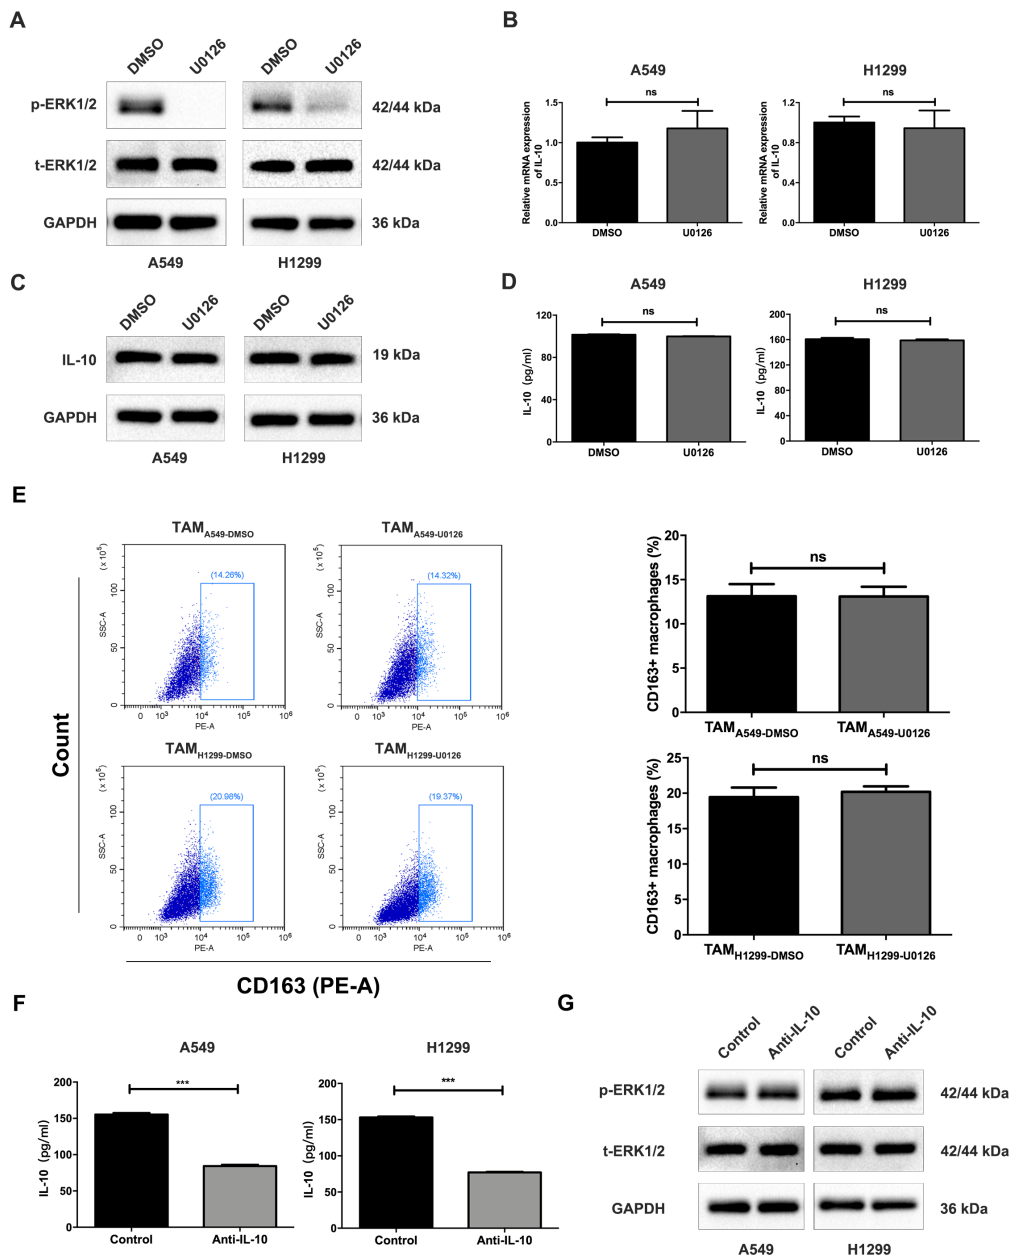

### Supplementary Figure 1 ERGR/MAPK/ERK activation and IL-10/M2

polarization is parallel. **(A)** The phosphorylation of ERK1/2 were markedly inhibited after 6h of U0126 treatment. **(B, C)** The mRNA and protein levels of IL-10 in A549 and H1299 cells were unaffected after 48h of U0126 treatment. **(D)** ELISA showed that IL-10 in the supernatant of A549 and H1299 cells was unaffected after 48h of U0126 treatment. **(E)** The proportion of CD163+

macrophages incubated with the conditional medium of A549/H1299-DMSO cells and A549/H1299-U0126 cells. (F) ELISA showed that anti-IL-10 antibody can neutralize IL-10 in the supernatant of A549 and H1299 cells effectively. (G) IL-10 blockade had no role in the phosphorylation of ERK1/2. ns, not significant, \*\*\* $P < 0.001$ .
